# Supplementary material for: Resistance to Somatostatin Analogs in Italian Acromegaly Patients: The MISS Study
Source: MDPI journal article supplement (doi:10.3390/jcm12010025), 2022-12-20
Supplement: s1 [file s1]

**Page 4 of 14**

We added the acronym for prolactin

**Page 5 of 14**

We used italics for "*p*-value" as used throughout the text and proposed capital letter if "*P*-value" was the first word in the sentence.

**Page 6 of 14**

We removed the word "significantly"

We used the acronym PRL

**Table 1**

We moved "92, 95.8" from the third row to the second

We proposed capital letter for "*P*-value" in the column header

**Table 2**

We proposed capital letter for "*P*-value" in the column header

**Table 3**

We proposed capital letter for "*P*-value" in the column header

We corrected the punctuation

**Table 4**

We proposed capital letter for "*P*-value" in the column header

**Table 5**

We proposed capital letter for "*P*-value" in the column header

**Page 10 of 14**

We changed "for" to "to"

**Page 11 of 14**

We changed "3" to "three"

We corrected the Founding Information as follows: "Contribution and support agreement for non-profit clinical trials between the Department of Medical Sciences of the University of Turin and Italfarmaco S.p.A, date 18/5/2018"
